# Supplementary material for: High Immunogenicity to Influenza Vaccination in Crohn’s Disease Patients Treated with Ustekinumab
Source: MDPI journal article supplement (doi:10.3390/vaccines8030455), 2020-08-14
Supplement: s1 [file s1]

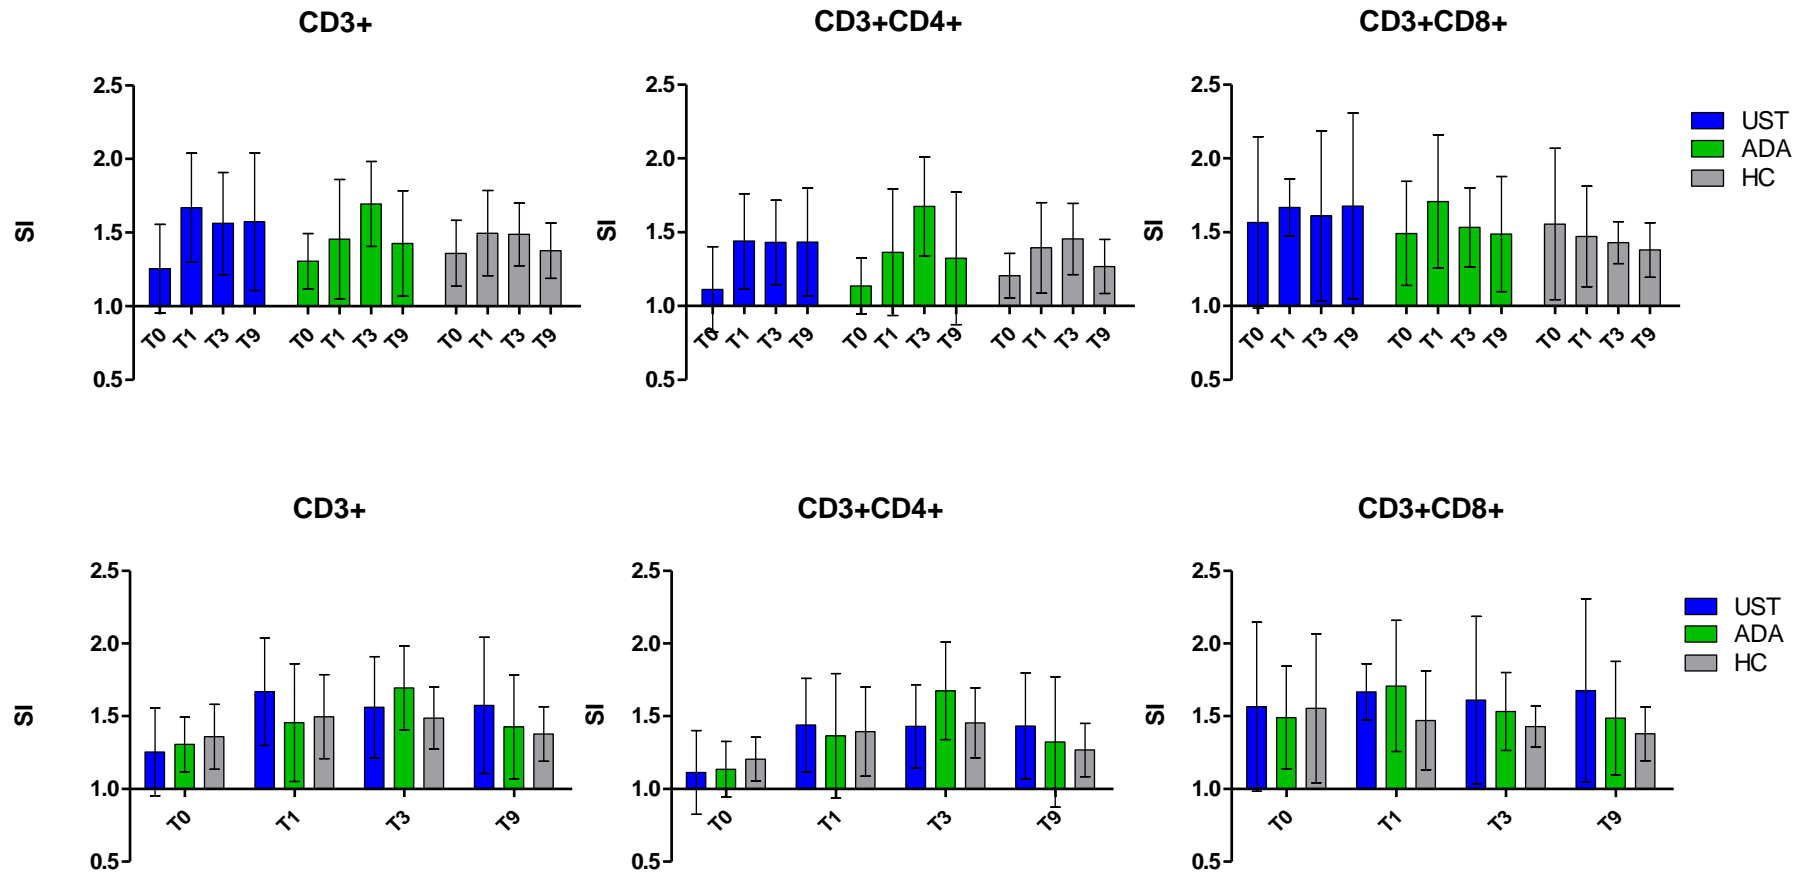

**Suppl. Figure 3. Bar charts of SI excluding outliers.**

Stimulation indexes of all three study groups per T-cell subset. 95% confidence intervals are shown. UST = ustekinumab users, SI = stimulation index, ADA = adalimumab users, HC = healthy controls. Significance: \* $p < 0.05$ , \*\* $p < 0.01$ . Outliers were detected with the Tukey's box-plot method which defines outliers as being outside the interquartile interval ( $Q1 - 1.5 \cdot IQR$ ,  $Q3 + 1.5 \cdot IQR$ ). The following outliers are excluded: COVA-207 (UST) T0 CD3/4/8, T1 CD4, T3 CD8, T9 CD3/4/8; COVA-208 (UST) T1 CD3/4, T3 CD3/8; COVA-209 (ADA) T3 CD8, T9 CD3/4/8, COVA-225 (HC) T0 CD3/CD8, T1 CD3/4/8, T9 CD8; COVA-239 (ADA) T1 CD4.
