# Supplementary material for: High Immunogenicity to Influenza Vaccination in Crohn’s Disease Patients Treated with Ustekinumab
Source: MDPI journal article supplement (doi:10.3390/vaccines8030455), 2020-08-14
Supplement: s1 [file s1]

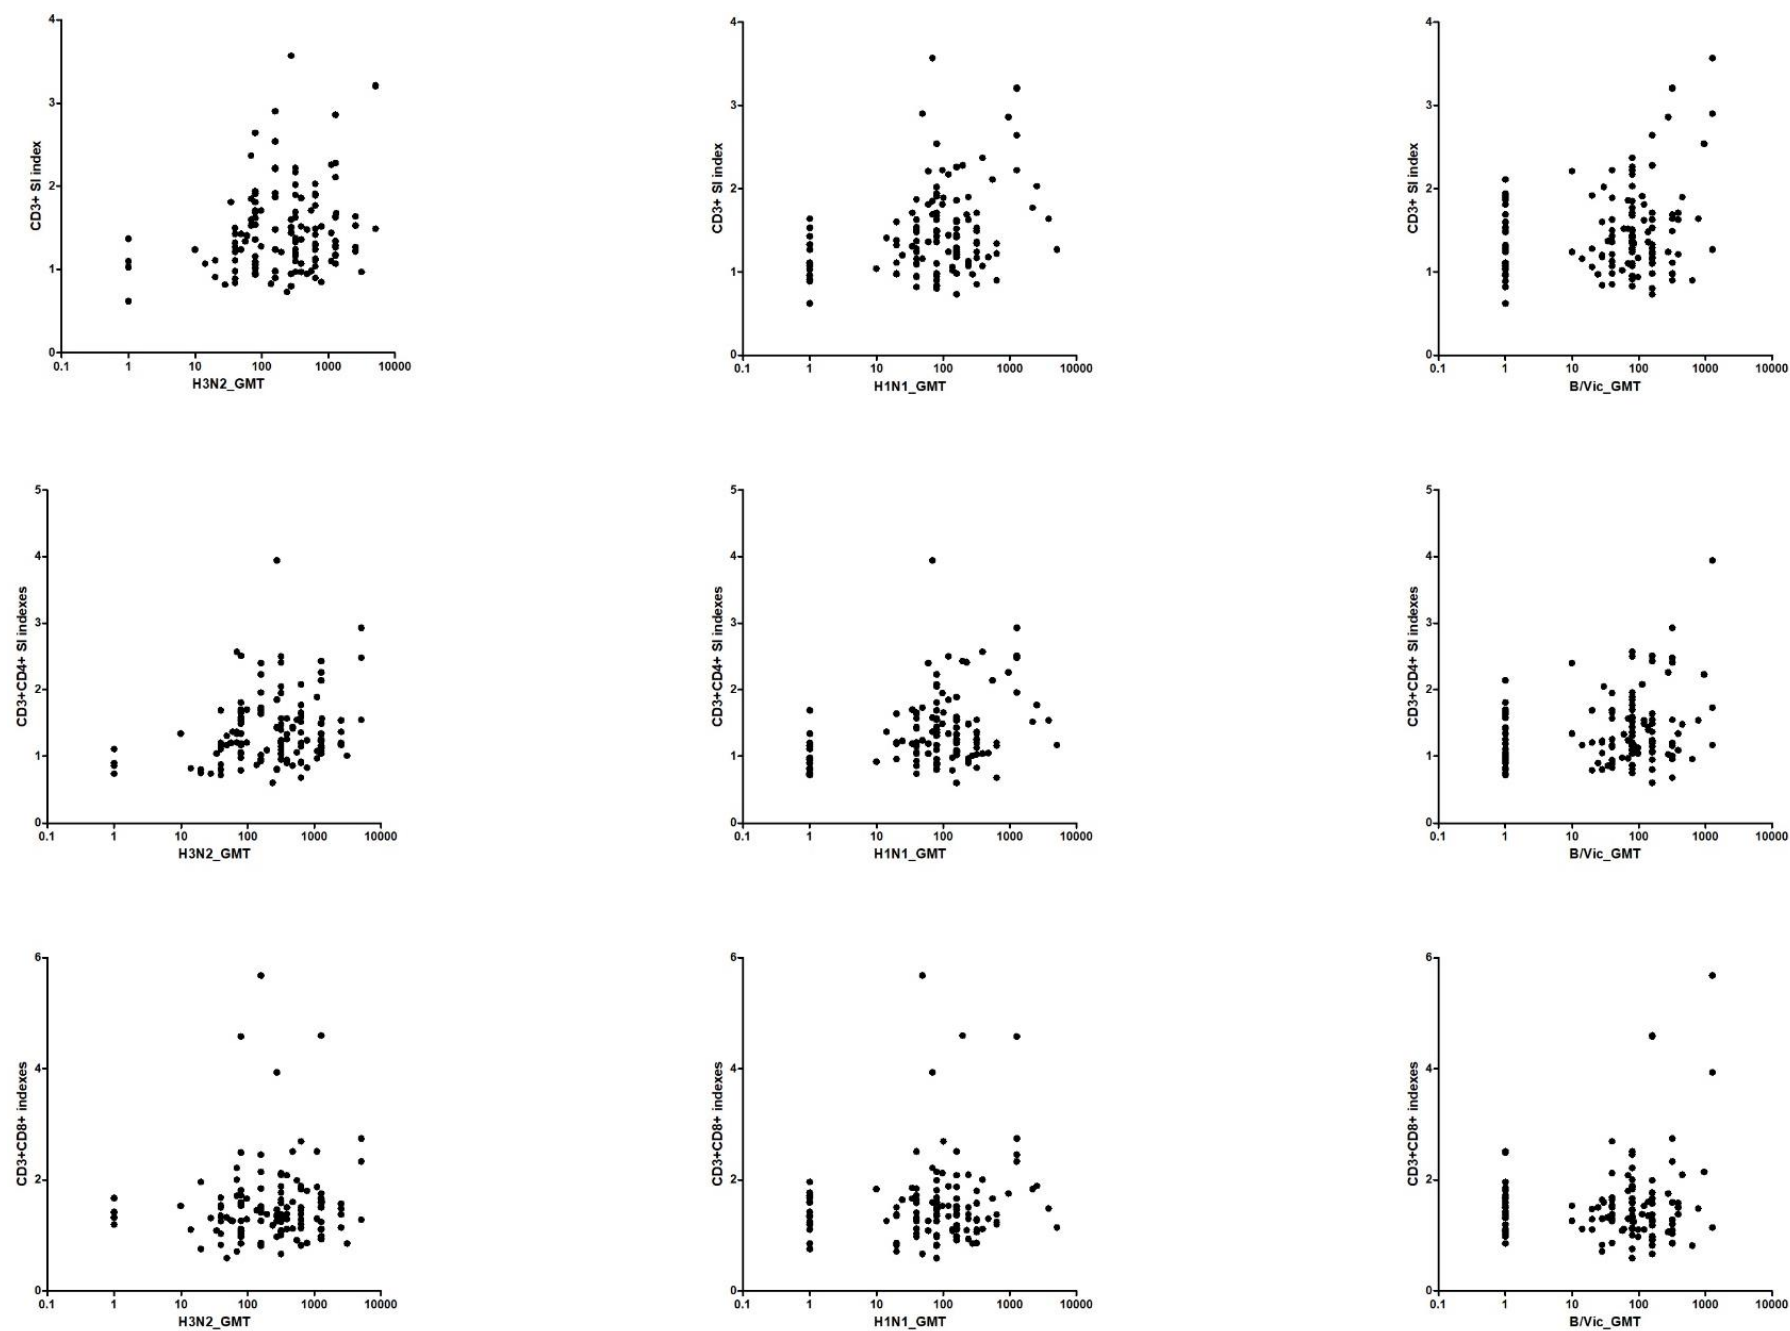

Supplementary figure 5: Scatter plots showing correlation between geometric mean titres and the stimulation indexes.

GMT = geometric mean titre, SI = stimulation index
