# Supplementary figures and images for: High Immunogenicity to Influenza Vaccination in Crohn’s Disease Patients Treated with Ustekinumab
Source: MDPI journal article supplement (doi:10.3390/vaccines8030455), 2020-08-14

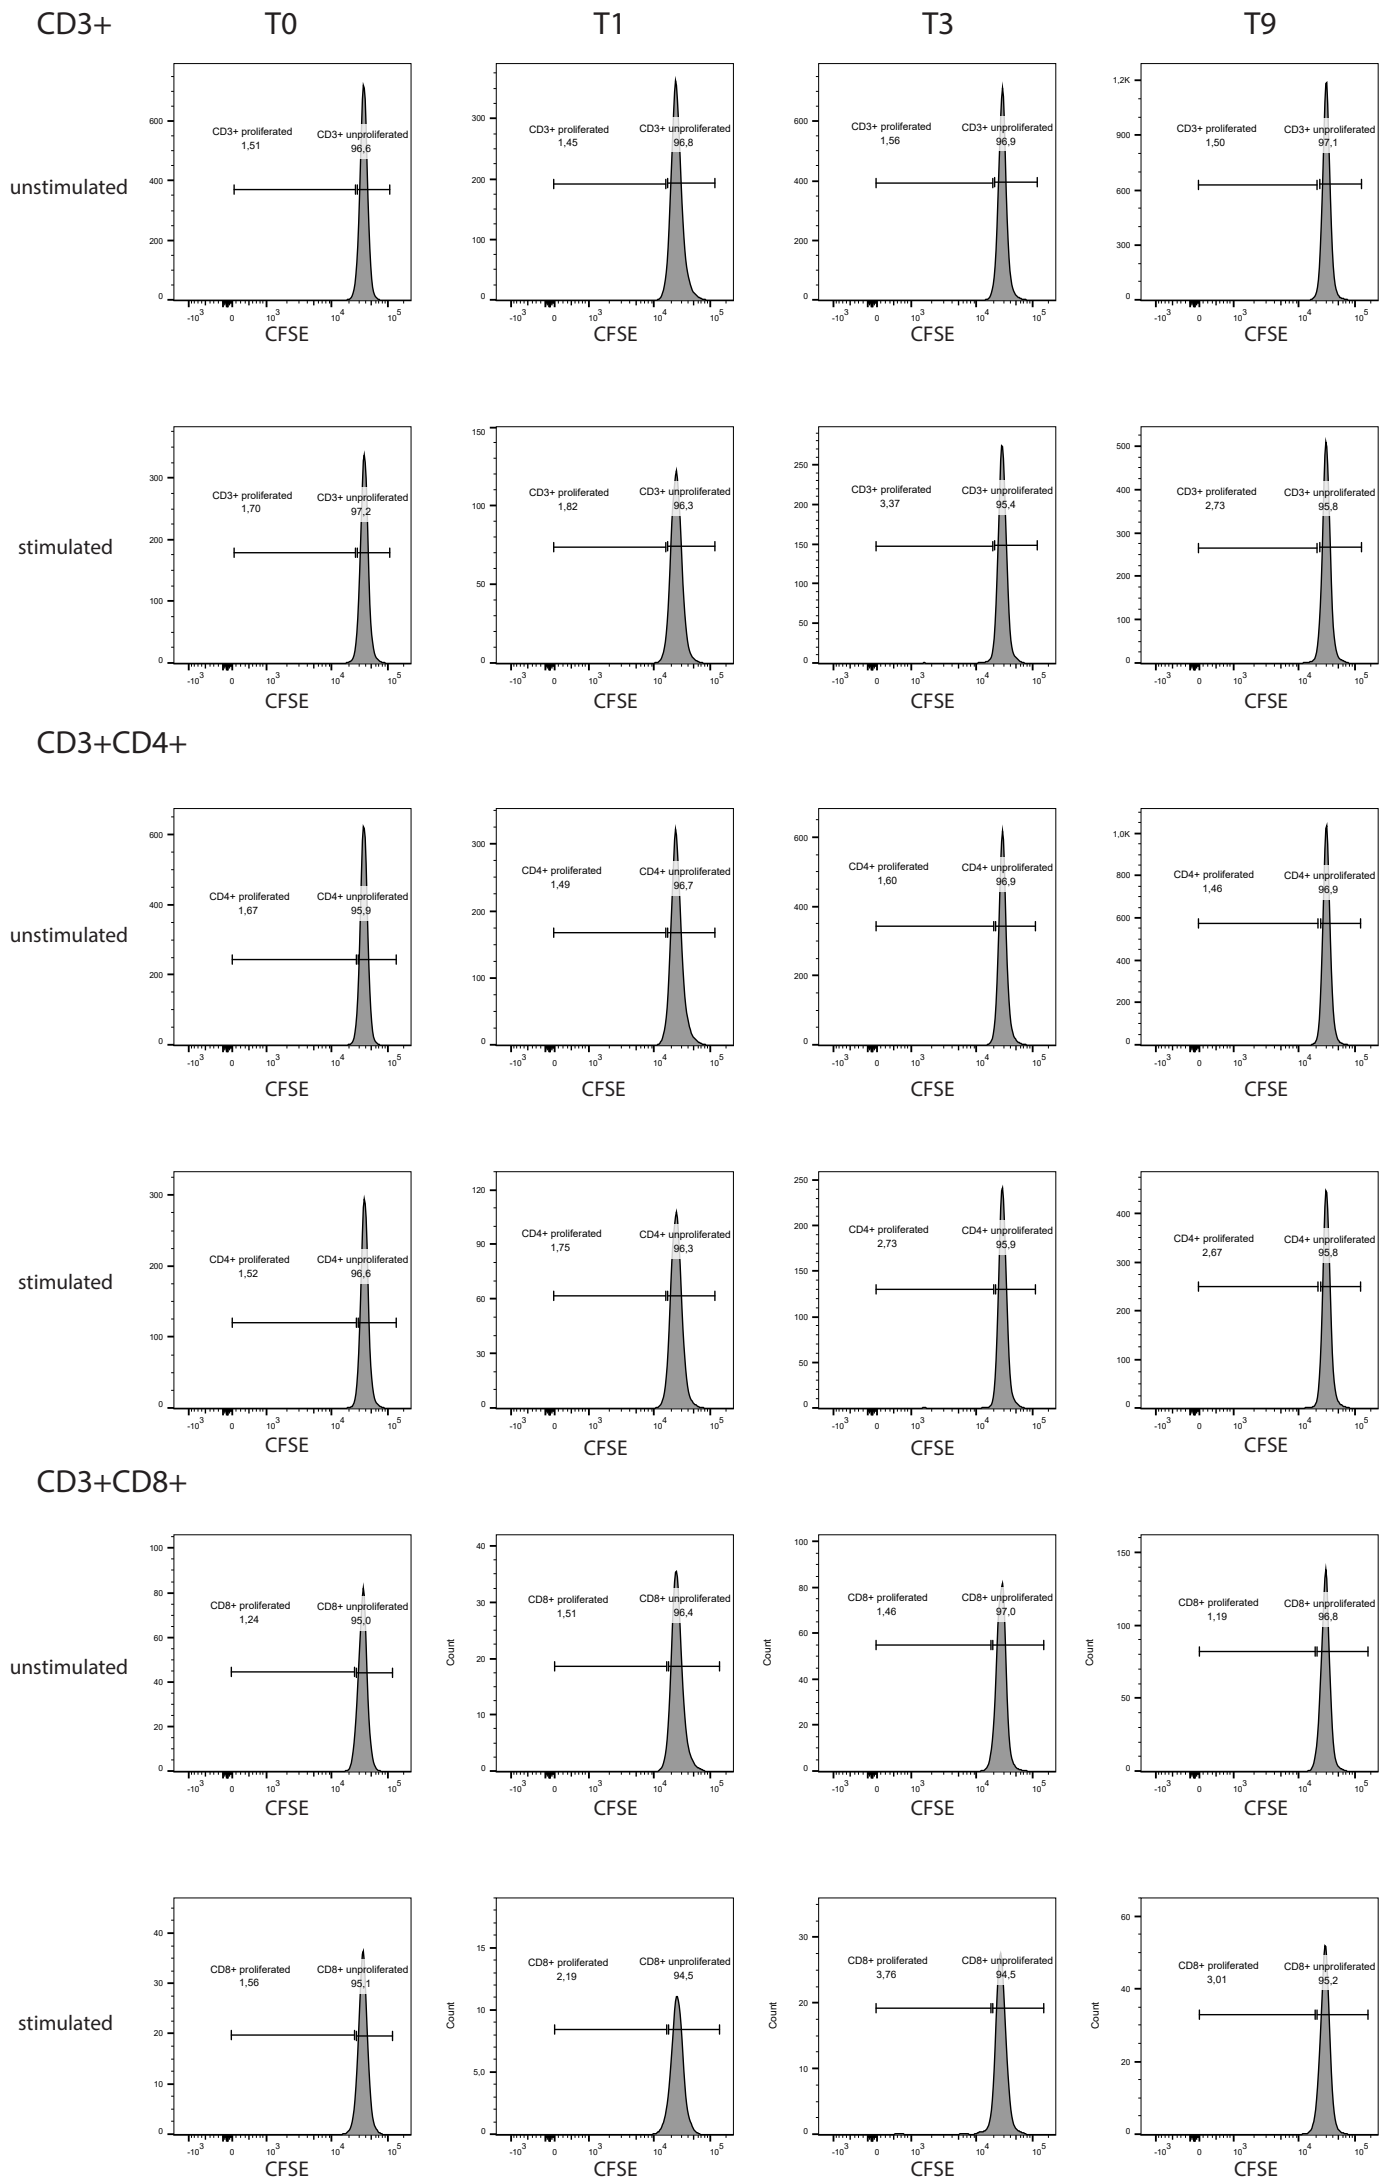

Supplement: s1 [file s1]

Supplementary Figure 1. Gating strategy on a sample stimulated with conA

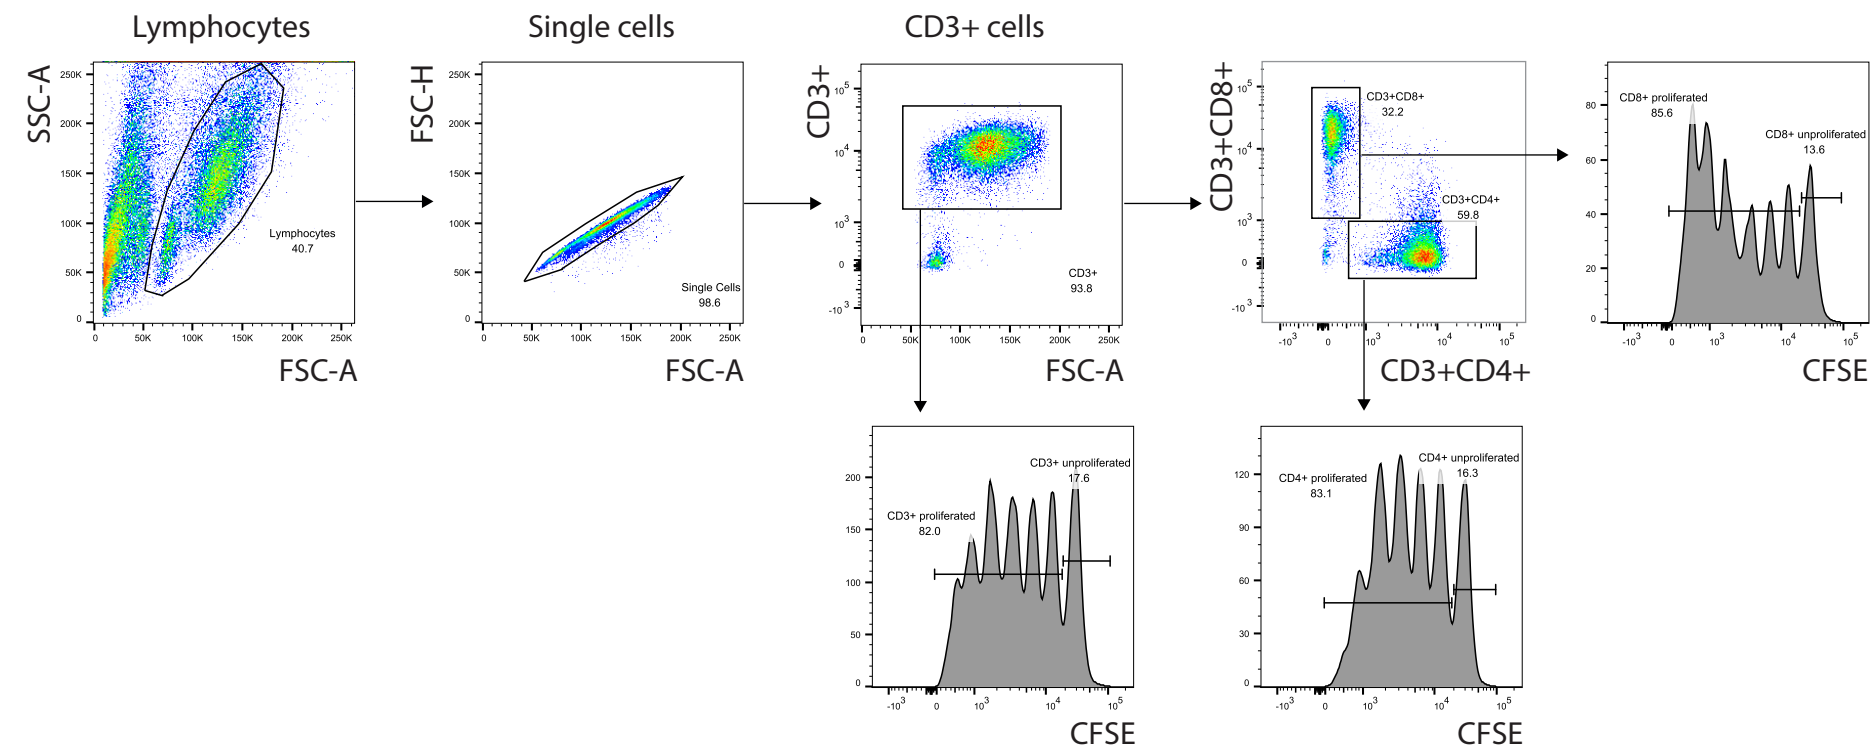

Supplement: s1 [file s1]
